# Supplementary material for: Public perception and attitude towards dengue prevention activity and response to dengue early warning in Malaysia
Source: PubMed Central journal article supplement (PMC6394956; doi:10.1371/journal.pone.0212497), 2019-02-28
Supplement: pone.0212497.s001.pdf [file pone.0212497.s001.pdf]

Sample ID

Form #

PERSONAL INFORMATION MAKLUMAT PERIBADI

**(Only tick one option on the questions unless other is stated Sila pilih satu jawapan sahaja, kecuali jika dinyatakan lain)**

|                                                                                                                                                                                                                                                                                                                                                                                                                                                                                                                                                                                                                                                                                                                                          |                                                                                                                                                                                                                                                                                                                                                                                                                                                                                                                                                                                                                                                                                                                                                                                                                                     |
|------------------------------------------------------------------------------------------------------------------------------------------------------------------------------------------------------------------------------------------------------------------------------------------------------------------------------------------------------------------------------------------------------------------------------------------------------------------------------------------------------------------------------------------------------------------------------------------------------------------------------------------------------------------------------------------------------------------------------------------|-------------------------------------------------------------------------------------------------------------------------------------------------------------------------------------------------------------------------------------------------------------------------------------------------------------------------------------------------------------------------------------------------------------------------------------------------------------------------------------------------------------------------------------------------------------------------------------------------------------------------------------------------------------------------------------------------------------------------------------------------------------------------------------------------------------------------------------|
| <p>1. Gender <i>Jantina</i></p> <p><input type="checkbox"/> Female <i>Perempuan</i></p> <p><input type="checkbox"/> Male <i>Lelaki</i></p>                                                                                                                                                                                                                                                                                                                                                                                                                                                                                                                                                                                               | <p>2. Age <i>Umur</i>:</p>                                                                                                                                                                                                                                                                                                                                                                                                                                                                                                                                                                                                                                                                                                                                                                                                          |
| <p>3. Nationality <i>Warganegara</i></p> <p><input type="checkbox"/> Malaysian <i>Malaysia</i></p> <p><input type="checkbox"/> Non Malaysian <i>Bukan Malaysia</i></p>                                                                                                                                                                                                                                                                                                                                                                                                                                                                                                                                                                   | <p>4. Race <i>Bangsa</i></p> <p><input type="checkbox"/> Malay <i>Melayu</i>    <input type="checkbox"/> Chinese <i>Cina</i></p> <p><input type="checkbox"/> Indian <i>India</i>    <input type="checkbox"/> Others <i>Lain-lain</i></p>                                                                                                                                                                                                                                                                                                                                                                                                                                                                                                                                                                                            |
| <p>5. Do you live in Petaling district?<br/><i>Adakah anda menetap di daerah Petaling?</i></p> <p><input type="checkbox"/> Yes <i>Ya</i></p> <p><input type="checkbox"/> No <i>Tidak</i> (Go to Q6, pergi ke Q6)</p>                                                                                                                                                                                                                                                                                                                                                                                                                                                                                                                     | <p>5(a). Do you study/work in Petaling district?<br/><i>Adakah anda belajar/bekerja di daerah Petaling?</i></p> <p><input type="checkbox"/> Yes <i>Ya</i>    <input type="checkbox"/> No <i>Tidak</i></p> <p>5(b). Period living in Petaling district<br/><i>Jangkamasa telah menetap di daerah Petaling</i></p> <p><input type="checkbox"/> &lt; 1 yr                      <input type="checkbox"/> ≥ 1-3 yrs<br/>    &lt; 1 tahun                      ≥ 1-3 tahun</p> <p><input type="checkbox"/> &gt; 3-5 yrs                      <input type="checkbox"/> &gt; 5 yrs<br/>    &gt; 3-5 tahun                      &gt; 5 tahun</p> <p>5(c). Do you own current residence?<br/><i>Adakah anda memiliki rumah yang anda diami?</i></p> <p><input type="checkbox"/> Yes <i>Ya</i>    <input type="checkbox"/> No <i>Tidak</i></p> |
| <p>6. What type of house you currently reside?<br/><i>Apakah jenis rumah yang anda diami sekarang?</i></p> <p><input type="checkbox"/> Individual house or bungalow<br/>    <i>Rumah sebuah atau banglo</i></p> <p><input type="checkbox"/> Twin/semi-detached house<br/>    <i>Rumah berkembar</i></p> <p><input type="checkbox"/> Terrace house<br/>    <i>Rumah teres atau berangkai</i></p> <p><input type="checkbox"/> Flat <i>Rumah pangsa</i></p> <p><input type="checkbox"/> Apartment/condominium<br/>    <i>Apartment/Kondominium</i></p> <p><input type="checkbox"/> Shophouse <i>Rumah kedai</i></p> <p><input type="checkbox"/> Long house <i>Rumah panjang</i></p> <p><input type="checkbox"/> Others <i>Lain-lain</i></p> | <p>7. Highest education level<br/><i>Tahap pendidikan tertinggi</i></p> <p><input type="checkbox"/> No formal education<br/>    <i>Tiada pendidikan formal</i></p> <p><input type="checkbox"/> Primary school<br/>    <i>Sekolah rendah</i></p> <p><input type="checkbox"/> Secondary school<br/>    <i>Sekolah menengah</i></p> <p><input type="checkbox"/> Diploma <i>Diploma</i></p> <p><input type="checkbox"/> Degree <i>Ijazah</i></p> <p><input type="checkbox"/> Master/PhD <i>Master/PhD</i></p>                                                                                                                                                                                                                                                                                                                           |

|                                                                                                                                                                                                                                                                                              |                                                                                                                                                                                                                                                                                                                                                                                                                                                  |
|----------------------------------------------------------------------------------------------------------------------------------------------------------------------------------------------------------------------------------------------------------------------------------------------|--------------------------------------------------------------------------------------------------------------------------------------------------------------------------------------------------------------------------------------------------------------------------------------------------------------------------------------------------------------------------------------------------------------------------------------------------|
| <p>8. Marital status<br/><i>Taraf perkahwinan</i></p> <p><input type="checkbox"/> Single <i>Bujang</i></p> <p><input type="checkbox"/> Married <i>Berkahwin</i></p> <p><input type="checkbox"/> Divorced <i>Bercerai</i></p> <p><input type="checkbox"/> Widow/Widower <i>Duda/janda</i></p> | <p>9. Occupation <i>Pekerjaan</i></p> <p><input type="checkbox"/> Student <i>Pelajar</i></p> <p><input type="checkbox"/> Self-employed <i>Bekerja sendiri</i></p> <p><input type="checkbox"/> Government workers <i>Pekerja kerajaan</i></p> <p><input type="checkbox"/> Private workers <i>Pekerja swasta</i></p> <p><input type="checkbox"/> Unemployed <i>Tidak berkerja</i></p> <p><input type="checkbox"/> Other <i>Lain-lain</i> _____</p> |
| <p>10. Have you had dengue fever before?<br/><i>Pernahkah anda mendapat demam denggi?</i></p> <p><input type="checkbox"/> Yes <i>Ya</i>    <input type="checkbox"/> No <i>Tidak</i></p>                                                                                                      | <p>11. Do you know any persons who have been infected with dengue?<br/><i>Adakah anda kenal sesiapa yang pernah dijangkiti denggi?</i></p> <p><input type="checkbox"/> Yes <i>Ya</i>    <input type="checkbox"/> No <i>Tidak</i></p>                                                                                                                                                                                                             |
| <p>12. Number of people in your household<br/><i>Jumlah orang yang menetap di kediaman anda</i></p> <p>_____</p>                                                                                                                                                                             | <p>12(a) State age of each individual live in your household<br/><i>Sila nyatakan umur setiap penghuni rumah anda</i></p> <p>_____</p>                                                                                                                                                                                                                                                                                                           |
| <p>13. What is your average monthly income?<br/><i>Apakah purata pendapatan bulanan anda?</i></p> <p>_____</p>                                                                                                                                                                               | <p>14. What is your average monthly household income?<br/><i>Apakah purata pendapatan isi rumah bulanan anda?</i></p> <p>_____</p>                                                                                                                                                                                                                                                                                                               |

**Terminology Istilah:**

- I. Dengue early warning: A warning of increasing dengue cases in the near future  
*Amaran awal denggi: Amaran tentang peningkatan kes denggi dalam masa terdekat*
  
- II. Climate-based early warning: A prediction of increasing dengue cases based on changes of temperature or rainfall patterns  
*Amaran awal berdasarkan iklim: Ramalan peningkatan kes denggi berdasarkan perubahan suhu atau corak hujan*

**A) PERCEPTION PERSEPSI:**

1. Do you know what is dengue fever?  
*Adakah anda tahu apa itu demam denggi*  
Yes Ya                      No Tidak
  
2. Do you think dengue fever can cause mortality?  
*Adakah anda rasa demam denggi boleh menyebabkan kematian?*  
Yes Ya                      No Tidak                      Don't know Tidak tahu
  
3. Do you think you and your family members could be infected with dengue fever?  
*Adakah anda rasa anda dan keluarga anda boleh dijangkiti demam denggi?*  
Yes Ya                      No Tidak                      Don't know Tidak tahu
  
4. In your opinion, what is your risk of being infected with dengue fever?  
*Pada pendapat anda, apakah risiko anda untuk dijangkiti demam denggi?*  
Low Rendah                      Medium Sederhana                      High Tinggi
  
5. Do you think you have sufficient knowledge of the ways to prevent yourself from dengue infection?  
*Adakah anda fikir anda mempunyai pengetahuan yang mencukupi tentang cara-cara untuk mengelakkan diri daripada jangkitan denggi?*  
Yes Ya                      No Tidak                      Don't know Tidak tahu
  
6. Do you think is the dengue situation serious in the area you live?  
*Adakah anda fikir situasi denggi serius di kawasan anda tinggal?*  
Yes Ya                      No Tidak                      Don't know Tidak tahu
  
7. Do you think is it possible you will be infected for dengue many times?  
*Adakah anda fikir anda boleh dijangkiti denggi dengan banyak kali?*  
Yes Ya                      No Tidak                      Don't know Tidak tahu

8. How concerned would you be if it was the second time or more for your parents/children to be infected with dengue?  
*Berapa bimbangkah anda jika ibubapa/anak-anak anda dijangkiti denggi untuk kali kedua atau lebih?*
- Very concerned *Sangat bimbang*       Concerned *Bimbang*  
 Slightly concerned *Sedikit bimbang*       Not concerned *Tidak bimbang*
9. Which methods can be used to protect yourself and your family members from dengue infection? (You may tick several options)  
*Kaedah-kaedah yang manakah boleh digunakan untuk melindungi diri anda dan ahli keluarga anda daripada jangkitan denggi? (Anda boleh menanda lebih daripada satu pilihan)*
- Nothing *Tiada*       Don't know *Tidak tahu*       Mosquito repellent *Penghalau nyamuk*       Insecticide *Racun serangga*  
 Bed nets *Kelambu*       Remove mosquitoes breeding sites *Penghapusan tempat pembiakan nyamuk*       Others *Lain-lain*
10. Do you think the global climate is changing?  
*Adakah anda rasa iklim global sedang berubah?*
- Yes *Ya*       No *Tidak*       Don't know *Tidak tahu*
11. Do you think the climate change does not influence Malaysia climate?  
*Adakah anda rasa perubahan iklim global tidak mempengaruhi iklim di Malaysia?*
- Yes *Ya*       No *Tidak*       Don't know *Tidak tahu*
12. Do you think the climate change affects human health?  
*Adakah anda rasa perubahan iklim mempengaruhi kesihatan manusia?*
- Yes *Ya*       No *Tidak*       Don't know *Tidak tahu*
13. Do you think the global warming could increase the risk of dengue outbreaks?  
*Adakah anda rasa pemanasan global boleh meningkatkan risiko untuk wabak denggi berlaku?*
- Yes *Ya*       No *Tidak*       Don't know *Tidak tahu*
14. Do you think the climatic factors may affect the life cycle of mosquitoes but not dengue cases?  
*Adakah anda rasa faktor iklim boleh mempengaruhi kitar hidup nyamuk tetapi bukan kes denggi?*
- Yes *Ya*       No *Tidak*       Don't know *Tidak tahu*
15. Do you think the number of dengue cases increases after rainy days?  
*Adakah anda rasa bilangan kes denggi akan meningkat selepas hujan beberapa hari?*
- Yes *Ya*       No *Tidak*       Don't know *Tidak tahu*
16. Do you think the increasing temperature elevates the number of dengue cases in your area?  
*Adakah anda rasa peningkatan suhu akan menambahkan bilangan kes denggi di kawasan anda?*
- Yes *Ya*       No *Tidak*       Don't know *Tidak tahu*

17. Do you think the information about previous temperature and rainfall can be used to predict dengue outbreak in future?

*Adakah anda rasa maklumat mengenai suhu dan hujan boleh digunakan untuk membuat ramalan wabak denggi di masa hadapan?*

Yes Ya                       No Tidak                       Don't know Tidak tahu

18. Do you think an early warning is a useful tool for community to take preventive actions to avoid possible infection within sufficient time?

*Adakah anda fikir amaran awal adalah alat yang berguna bagi masyarakat untuk mengambil tindakan pencegahan bagi mengelakkan kemungkinan jangkitan denggi dalam tempoh masa yang mencukupi?*

Yes Ya                       No Tidak                       Don't know Tidak tahu

## **B) ATTITUDE OF DENGUE EARLY WARNING SIKAP UNTUK AMARAN AWAL DENGGI**

19. I want to help to reduce number of dengue cases in my area

*Saya mahu membantu mengurangkan bilangan kes denggi di kawasan saya*

Yes Ya                       No Tidak                       Not sure Tidak pasti

20. An early warning is important for the prevention of dengue outbreak

*Amaran awal adalah penting untuk mencegah wabak denggi*

Yes Ya                       No Tidak                       Not sure Tidak pasti

21. It is possible to predict dengue outbreak using climate

*Wabak denggi boleh diramalkan dengan menggunakan iklim*

Yes Ya                       No Tidak                       Not sure Tidak pasti

22. A warning of dengue in advance helps us to avoid potential dengue infections

*Amaran awal denggi dapat membantu untuk mengelakkan potensi mendapat jangkitan denggi*

Yes Ya                       No Tidak                       Not sure Tidak pasti

23. I will only believe a dengue early warning if it is based on risk factors other than climate

*Saya hanya akan mempercayai amaran awal denggi sekiranya ramalan dibuat berdasarkan faktor-faktor selain daripada iklim*

Yes Ya                       No Tidak

24. I will believe an early warning ONLY IF THE INFORMATION is provided by the government agency

*Saya akan percaya dengan amaran awal HANYA JIKA MAKLUMAT yang disediakan adalah daripada agensi kerajaan*

Yes Ya                       No Tidak

25. The government agency should include information of early warning of dengue outbreak as and when they update dengue situations for the public  
*Agensi kerajaan hendaklah menyertakan maklumat amaran awal wabak denggi apabila mereka mengemaskini maklumat keadaan denggi untuk orang ramai*  
 Yes Ya                       No Tidak                       Not sure Tidak pasti
26. We do not need an early warning since weekly dengue situations for my area is available online or social media  
*Kita tidak memerlukan amaran awal kerana keadaan denggi mingguan untuk kawasan saya boleh didapati 'online' atau daripada media sosial*  
 Yes Ya                       No Tidak                       Not sure Tidak pasti
27. It is a waste of time and efforts on dengue control if the predicted risk of dengue outbreak does not come true  
*la adalah satu pembaziran masa dan usaha pada kawalan denggi jika risiko wabak denggi yang diramalkan tidak menjadi kenyataan*  
 Yes Ya                       No Tidak                       Not sure Tidak pasti
28. It is pointless for me to take action even with early dengue warning since my neighbours will not  
*la adalah sia-sia bagi saya untuk mengambil tindakan walaupun dengan amaran awal denggi kerana jiran saya tidak akan bertindak*  
 Yes Ya                       No Tidak
29. The community in my area needs public education about dengue early warning  
*Masyarakat di kawasan saya perlu diberi pendidikan awam mengenai amaran awal denggi*  
 Yes Ya                       No Tidak                       Not sure Tidak pasti
30. I want to know more about how climate can be used to predict a dengue outbreak  
*Saya ingin mengetahui dengan lebih lanjut mengenai bagaimana maklumat iklim boleh digunakan untuk meramal wabak denggi*  
 Yes Ya                       No Tidak
31. I would like to receive a periodical update on information of dengue early warning  
*Saya ingin menerima pengemaskinian berkala tentang maklumat berkenaan amaran awal denggi*  
 Yes Ya                       No Tidak
32. In what way, would you like to receive an early warning for dengue?  
*Dengan cara apakah, anda ingin menerima amaran awal denggi?*
- Mobile APP                       SMS                       Radio                       Television  
*Aplikasi mudah alih                      SMS                      Radio                      Televisyen*
- Facebook                       Twitter                       Instagram  
*Facebook                      Twitter                      Instagram*
- Other media *Lain-lain media* \_\_\_\_\_

### C) RESPOND TOWARDS AN EARLY WARNING **MAKLUMBALAS TERHADAP AMARAN AWAL**

33. I check current dengue situations or hotspots around my area regularly

*Saya kerap memeriksa situasi denggi semasa atau titik panas di sekitar kawasan saya*

Yes Ya  No Tidak

34. I do not know what to do if someone informs me that it is very likely to have a dengue outbreak in the near future

*Saya tidak tahu apa yang perlu dilakukan jika seseorang memberitahu saya bahawa ia adalah sangat mungkin untuk wabak denggi berlaku dalam masa terdekat*

Yes Ya  No Tidak  Not sure Tidak pasti

35. I will take extra action to prevent dengue infection if I know the risk of dengue is increasing in my area

*Saya akan mengambil tindakan tambahan untuk mencegah jangkitan denggi jika saya tahu risiko denggi semakin meningkat di kawasan saya*

Yes Ya  No Tidak  Not sure Tidak pasti

36. After I receive an early warning of dengue outbreak from the government agency, I will:

*Selepas saya menerima amaran awal wabak denggi daripada agensi kerajaan, saya akan:*

a) Increase source reduction activities

*Meningkatkan aktiviti pengurangan sumber*

Yes Ya  No Tidak  Not sure Tidak pasti

b) Avoid outdoor activities at dawn or dusk

*Mengelakkan aktiviti luar pada waktu awal pagi atau senja*

Yes Ya  No Tidak  Not sure Tidak pasti

c) Share information with others

*Berkongsi maklumat dengan orang lain*

Yes Ya  No Tidak  Not sure Tidak pasti

d) Request chemical fogging

*Membuat permintaan untuk 'chemical fogging'*

Yes Ya  No Tidak  Not sure Tidak pasti

e) Call local authorities

*Menelefon pihak berkuasa tempatan*

Yes Ya  No Tidak  Not sure Tidak pasti

f) Use mosquito net

*Menggunakan kelambu*

Yes Ya  No Tidak  Not sure Tidak pasti

37. I need to know how severe the predicted dengue outbreak will be in order to decide whether preventive measures are required  
*Saya perlu tahu bagaimana teruk keadaan wabak denggi yang diramalkan akan berlaku, untuk membuat keputusan sama ada langkah-langkah pencegahan diperlukan atau tidak.*  
 Yes Ya                       No Tidak                       Not sure Tidak pasti
38. I will stop action to prevent dengue infection if I know the risk of dengue in my area is low  
*Saya akan berhenti mengambil tindakan untuk mencegah jangkitan denggi jika saya tahu risiko denggi di kawasan saya adalah rendah*  
 Yes Ya                       No Tidak
39. The government agency will conduct mosquito control program after they receive an early warning of dengue, so individual household does not need to do anything  
*Agensi kerajaan akan menjalankan program kawalan nyamuk selepas mereka menerima amaran awal denggi, jadi setiap isi rumah tidak perlu berbuat apa-apa*  
 Yes Ya                       No Tidak                       Not sure Tidak pasti
40. Removal of mosquitoes breeding sites at my premises will reduce the chance of dengue infections among my family members  
*Pembuangan tempat pembiakan nyamuk di premis saya akan mengurangkan peluang jangkitan denggi di kalangan ahli keluarga saya*  
 Yes Ya                       No Tidak                       Not sure Tidak pasti
41. The local authority has already provided sufficient effort on dengue control in my area  
*Pihak berkuasa tempatan telah memberi usaha yang mencukupi bagi kawalan denggi di kawasan saya*  
 Yes Ya                       No Tidak                       Not sure Tidak pasti
42. Chemical fogging by the local authority is good enough for us to prevent from dengue infection  
*Aktiviti 'chemical fogging' oleh pihak berkuasa tempatan adalah sudah cukup baik untuk kami bagi mencegah jangkitan denggi*  
 Yes Ya                       No Tidak                       Not sure Tidak pasti
43. It is not my responsibility to remove mosquito breeding sites in my residence  
*la bukan tanggungjawab saya untuk menghapuskan tempat pembiakan nyamuk di kediaman saya*  
 Yes Ya                       No Tidak
44. It is the responsibility of my family member to remove mosquito breeding sites in my residence  
*Adalah menjadi tanggungjawab ahli keluarga saya untuk menghapuskan tempat pembiakan nyamuk di kediaman saya*  
 Yes Ya                       No Tidak



45. It is necessary to continue the removal of mosquito breeding at home even during the period when there's no dengue outbreak  
*la adalah perlu untuk meneruskan penghapusan tempat pembiakan nyamuk di rumah walaupun dalam tempoh yang tiada wabak denggi*  
Yes *Ya*                      No *Tidak*                      Not sure *Tidak pasti*
46. I can help to reduce dengue cases in my area by removing mosquito breeding sites at home  
*Saya boleh membantu untuk mengurangkan kes denggi di kawasan saya dengan menghapuskan tempat pembiakan nyamuk di rumah*  
Yes *Ya*                      No *Tidak*                      Not sure *Tidak pasti*
47. Dengue outbreak in my community can be controlled if every household is committed to remove mosquito breeding sites  
*Wabak denggi dalam masyarakat saya boleh dikawal jika setiap isi rumah komited untuk menghapuskan tempat pembiakan nyamuk*  
Yes *Ya*                      No *Tidak*                      Not sure *Tidak pasti*
48. I will take part in a public activity for dengue control or removal of mosquitoes breeding sites  
*Saya akan mengambil bahagian dalam aktiviti awam untuk kawalan denggi atau penghapusan tempat pembiakan nyamuk*  
Yes *Ya*                      No *Tidak*                      Not sure *Tidak pasti*
49. In your opinion, who should be responsible for preventing the spread of dengue disease? (You may tick several options)  
*Pada pendapat anda, siapa yang perlu bertanggungjawab dalam mencegah penyebaran penyakit denggi? (Anda boleh menanda lebih dari satu pilihan)*
- Health authority *Pihak berkuasa kesihatan*
  - Local council *Majlis perbandaran*
  - Community leaders *Ketua komuniti*
  - Every household *Setiap isi rumah tempatan*
  - I don't think control actions are needed *Saya tidak fikir tindakan kawalan adalah perlu*
50. In your opinion, what is the most effective method to reduce dengue infections in your area?  
*Pada pendapat anda, apakah cara yang paling berkesan untuk mengurangkan jangkitan denggi di kawasan anda?*
- Search & destroy mosquito breeding sites  
*Mencari dan memusnahkan tempat pembiakan nyamuk*
  - Prevent from mosquito bites *Mengelakkan gigitan nyamuk*
  - Chemical fogging 'Chemical fogging'
  - Don't know *Tidak tahu*

**This is the end of survey. Thank you for helping.**  
***Soalan kaji selidik tamat. Terima kasih kerana membantu.***
